# Supplementary material
Source: PubMed Central journal article supplement (PMC4801134)

**Web Table 1.** Hazard ratios for 18 metabolites significantly related to all-cause mortality in single-metabolite analysis among African Americans in the Atherosclerosis Risk in Communities (ARIC) Study, 1987–2011

| <b>Metabolite</b>                                       | <b>Super-Pathway</b> | <b>Missing Rate</b> | <b>Hazard Ratio</b> | <b>95% CI</b> | <b>P Value</b> |
|---------------------------------------------------------|----------------------|---------------------|---------------------|---------------|----------------|
| 5-Oxoproline                                            | Amino acid           | 0.00%               | 0.81                | (0.74,0.88)   | 3.51E-07       |
| $\alpha$ -Hydroxyisovalerate                            | Amino acid           | 0.00%               | 1.14                | (1.08,1.2)    | 4.58E-07       |
| <i>N</i> -Acetylalanine                                 | Amino acid           | 0.10%               | 1.12                | (1.06,1.18)   | 3.30E-05       |
| Mannose                                                 | Carbohydrate         | 0.05%               | 1.22                | (1.13,1.31)   | 1.22E-07       |
| Glycocholate                                            | Lipid                | 11.84%              | 1.12                | (1.07,1.16)   | 1.38E-07       |
| Pregnen-diol disulfate                                  | Lipid                | 0.10%               | 1.17                | (1.10,1.25)   | 5.03E-07       |
| Andro-steroid monosulfate 2                             | Lipid                | 36.52%              | 1.13                | (1.08,1.19)   | 8.92E-07       |
| 4-Androsten-3 $\beta$ ,<br>17 $\beta$ -diol disulfate 1 | Lipid                | 0.15%               | 1.13                | (1.07,1.19)   | 3.33E-06       |
| Uridine                                                 | Nucleotide           | 0.00%               | 0.86                | (0.79,0.92)   | 4.27E-05       |
| $\gamma$ -Glutamylleucine                               | Peptide              | 0.00%               | 0.80                | (0.74,0.87)   | 4.42E-08       |
| Cotinine                                                | Xenobiotic           | 63.63%              | 1.40                | (1.23,1.59)   | 2.78E-07       |
| X-11440                                                 | No super-pathway     | 0.91%               | 1.22                | (1.14,1.30)   | 2.45E-09       |
| X-14662                                                 | No super-pathway     | 41.27%              | 1.17                | (1.10,1.24)   | 2.51E-07       |
| X-11372                                                 | No super-pathway     | 0.10%               | 0.81                | (0.75,0.89)   | 1.27E-06       |
| X-12688                                                 | No super-pathway     | 1.77%               | 1.17                | (1.1,1.26)    | 4.90E-06       |
| X-11687_200                                             | No super-pathway     | 35.71%              | 1.14                | (1.08,1.21)   | 9.64E-06       |
| X-12846                                                 | No super-pathway     | 23.67%              | 1.11                | (1.06,1.17)   | 1.37E-05       |
| X-11299                                                 | No super-pathway     | 3.19%               | 1.14                | (1.07,1.22)   | 9.96E-05       |

Values shown are hazard ratios obtained from Cox proportional hazards regression. Covariates were: age, sex, body mass index, systolic blood pressure, antihypertensive medication use, diabetes status, current smoking status, prevalent cardiovascular disease status, plasma high-density lipoprotein cholesterol level, total cholesterol level, and estimated glomerular filtration rate from baseline measurement.

**Web Table 2.** Hazard ratios for 5 metabolites significantly related to cardiovascular mortality in single-metabolite analysis among African Americans in the Atherosclerosis Risk in Communities (ARIC) Study, 1987–2011

| <b>Metabolite</b> | <b>Super-Pathway</b> | <b>Missing Rate</b> | <b>Hazard Ratio</b> | <b>95% CI</b> | <b>P Value</b> |
|-------------------|----------------------|---------------------|---------------------|---------------|----------------|
| Mannose           | Carbohydrate         | 0.05%               | 1.33                | (1.21,1.47)   | 1.71E-08       |
| Glucose           | Carbohydrate         | 0.00%               | 1.29                | (1.16,1.43)   | 3.64E-06       |
| Glycocholate      | Lipid                | 11.84%              | 1.13                | (1.07,1.22)   | 4.05E-05       |
| X-12846           | No super-pathway     | 23.67%              | 1.14                | (1.07,1.20)   | 3.84E-05       |
| X-11440           | No super-pathway     | 0.91%               | 1.21                | (1.10,1.34)   | 1.11E-04       |

Values shown are hazard ratios observed from Cox proportional hazards regression. Covariates were: age, sex, body mass index, systolic blood pressure, antihypertensive medication use, diabetes status, current smoking status, prevalent cardiovascular disease status, plasma high-density lipoprotein cholesterol level, total cholesterol level, and estimated glomerular filtration rate from baseline measurement.

**Web Figure 1.** Cumulative incidence of all-cause mortality (A) and cardiovascular mortality (B) by quartile of mannose level among African Americans in the Atherosclerosis Risk in Communities (ARIC) Study, 1987–2011.

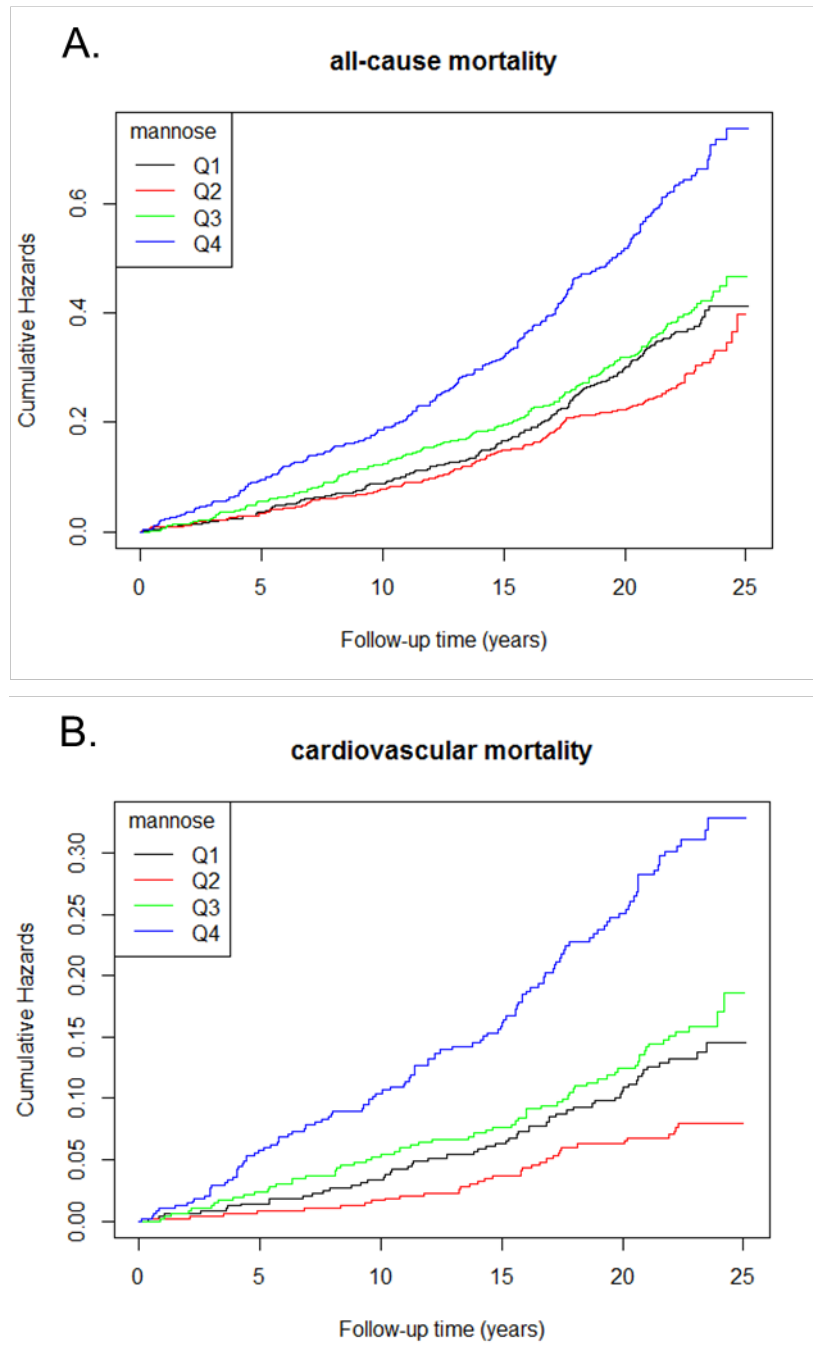

Supplement: supp_kwv213_kwv213supp.pdf [file supp_kwv213_kwv213supp.pdf]
